# Supplementary material for: Unkeito Suppresses RANKL-Mediated Osteoclastogenesis via the Blimp1–Bcl6 and NF-κB Signaling Pathways and Enhancing Osteoclast Apoptosis
Source: MDPI journal article supplement (doi:10.3390/ijms23147814), 2022-07-15
Supplement: s1 [file s1]

# Unkeito Suppresses RANKL-Mediated Osteoclastogenesis *Via* the Blimp1-Bcl6 and NF- $\kappa$ B Signaling Pathways and Enhancing Osteoclast Apoptosis

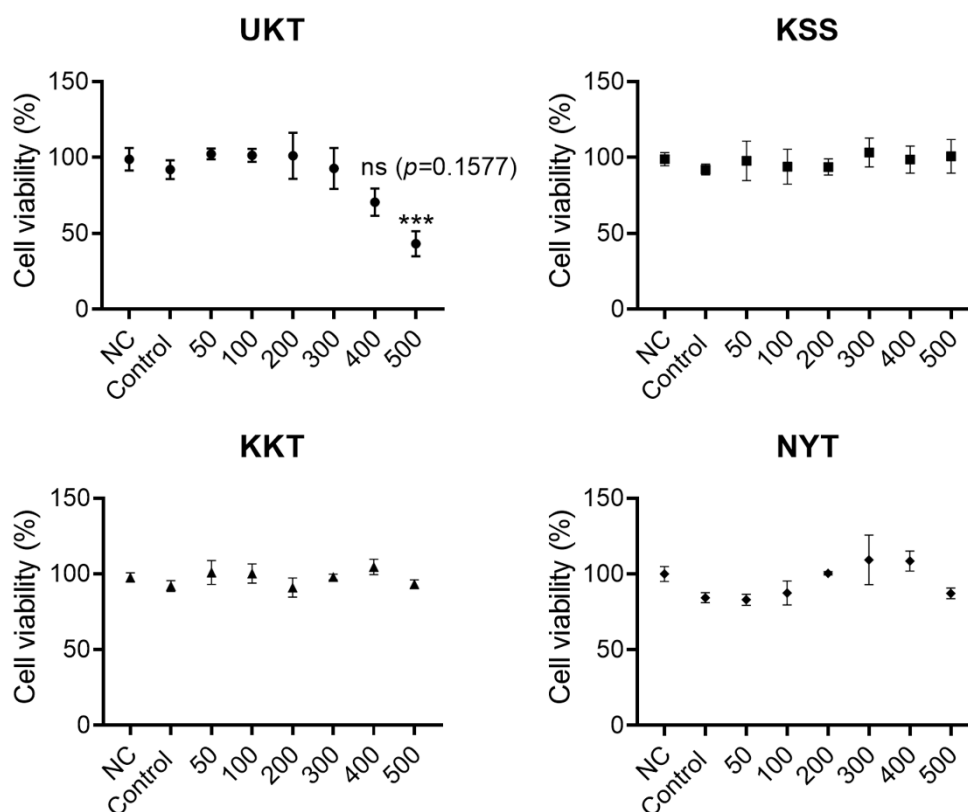

**Figure S1.** Cell viability of Unkeito (UKT), Kamishoyosan (KSS), Kamikihito (KKT), and Ninjinyoeito (NYT) in RAW 264 cells. RAW 264 cells were seeded at  $2 \times 10^4$  per well in 96-well plates, cultured overnight, and treated with various concentrations of Kampo medicine extracts at 37 °C in a 5% CO<sub>2</sub> atmosphere for 24 h. Next, 10  $\mu$ L of CCK-8 solution was added to each well and incubated at 37 °C for 1 h. The absorbance (optical density, OD 450 nm) was measured (n = 4). Error bars represent  $\pm$  standard error of the mean. ns, not significant differences, \*\*\*  $p < 0.005$  versus the control groups; NC: negative control

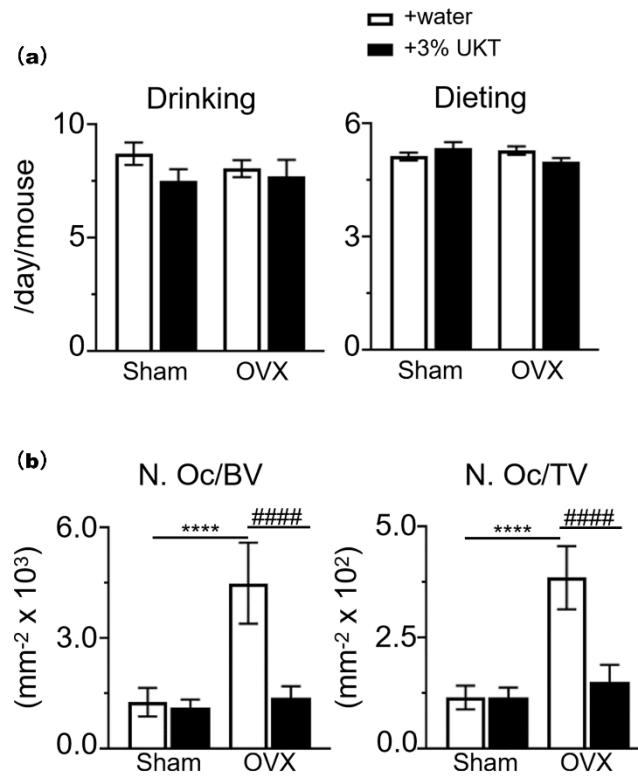

**Figure S2.** Eight-week aged CD-1 mice were daily administrated Unkeito (UKT) in drinking water for 28 consecutive days, following sham or ovariectomy (OVX)-operation (sham + water, n = 11; sham + 3% UKT, n = 11; OVX + water, n = 11; OVX + 3% UKT, n = 11). Open bar represents mice with water, while closed bar represents mice treated with 3% UKT. (a) Average of drinking volume and food intake/day/mouse; (b) Quantitative data from histomorphometric analysis. Two-way ANOVA was used, followed by the Tukey's multiple comparison tests. Data expressed as means ± standard error of mean for each group. \*\*\*\**p* < 0.0001, vs. sham-operated mice with water. ####*p* < 0.0001, vs. OVX-operated mice with water. N.Oc/BV, osteoclast number/bone volume; N.Oc/TV, osteoclast number/tissue volume

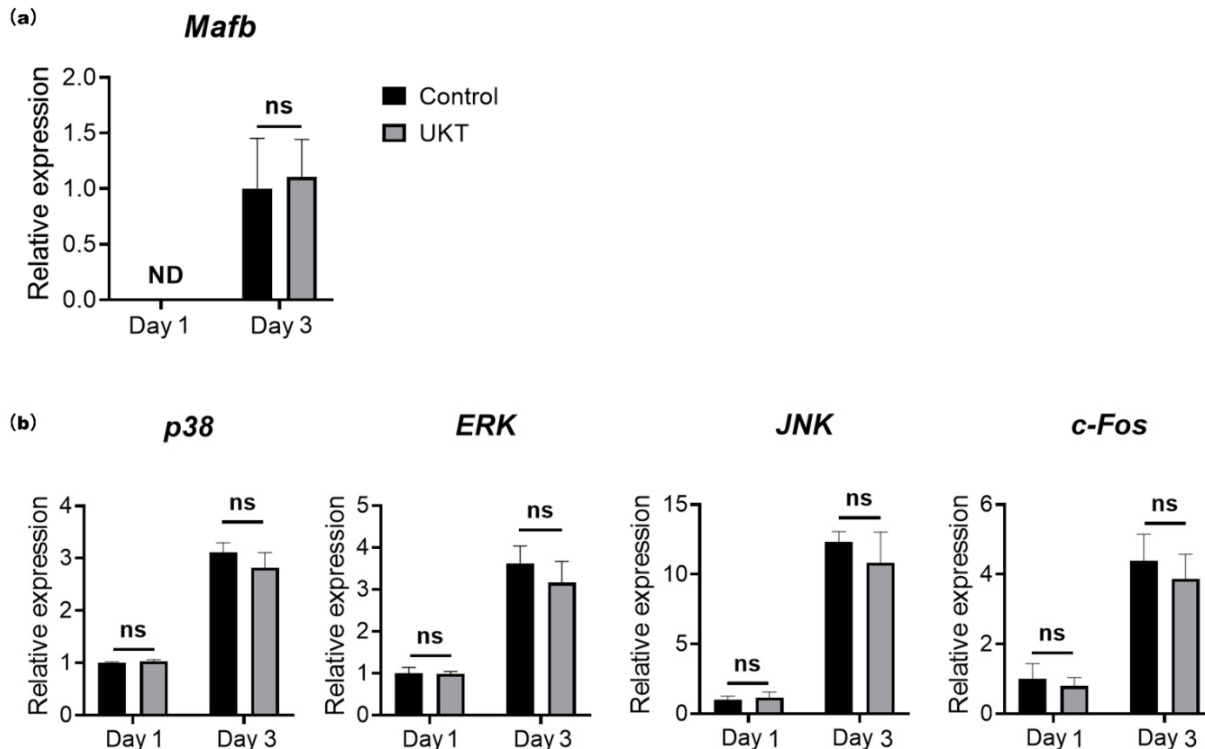

**Figure S3.** Unkeito (UKT) has no effect on the inhibition of the MAPK pathway and Blimp1-Mafb axis. The mRNA expression levels of (a) *Mafb*, (b) *p38*, *ERK*, *JNK*, and *c-Fos* normalized to that of *Gapdh* (n = 3). Error bars represent ± standard error of mean. ns, not significant versus the control groups (black box); ND: not detected

(a)

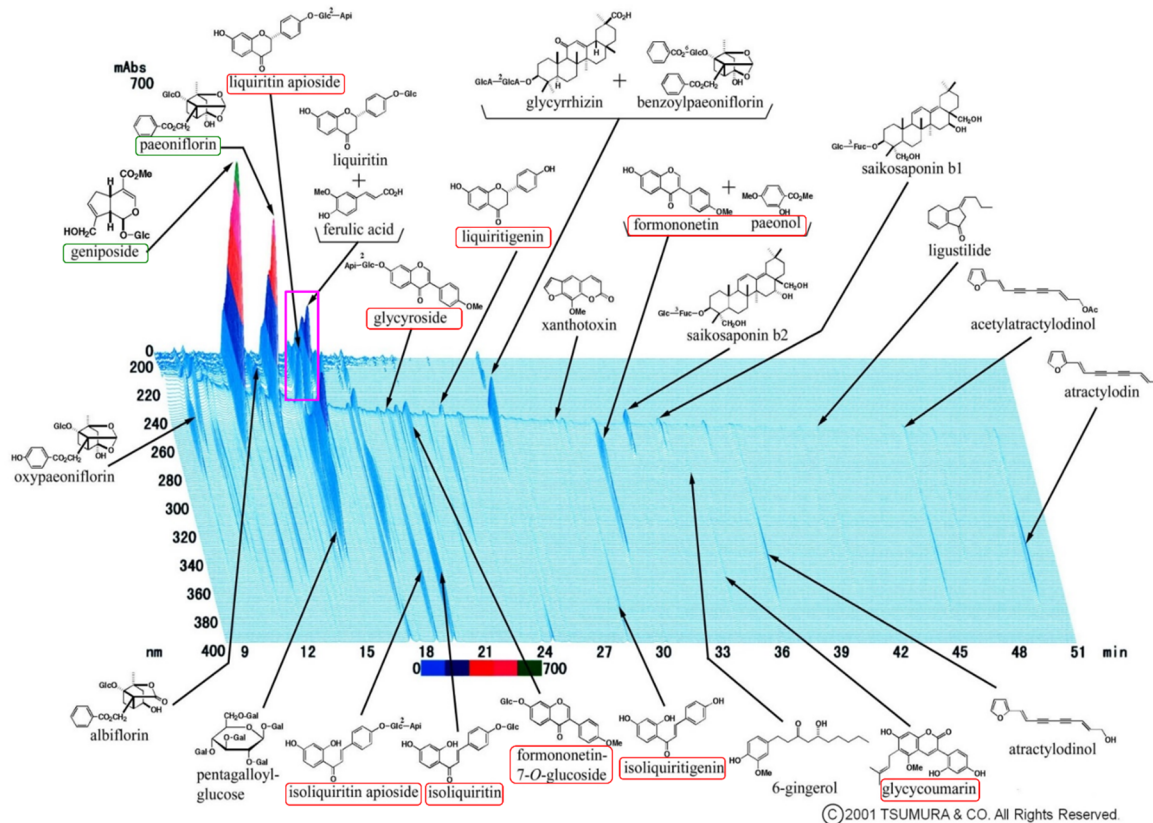

(b)

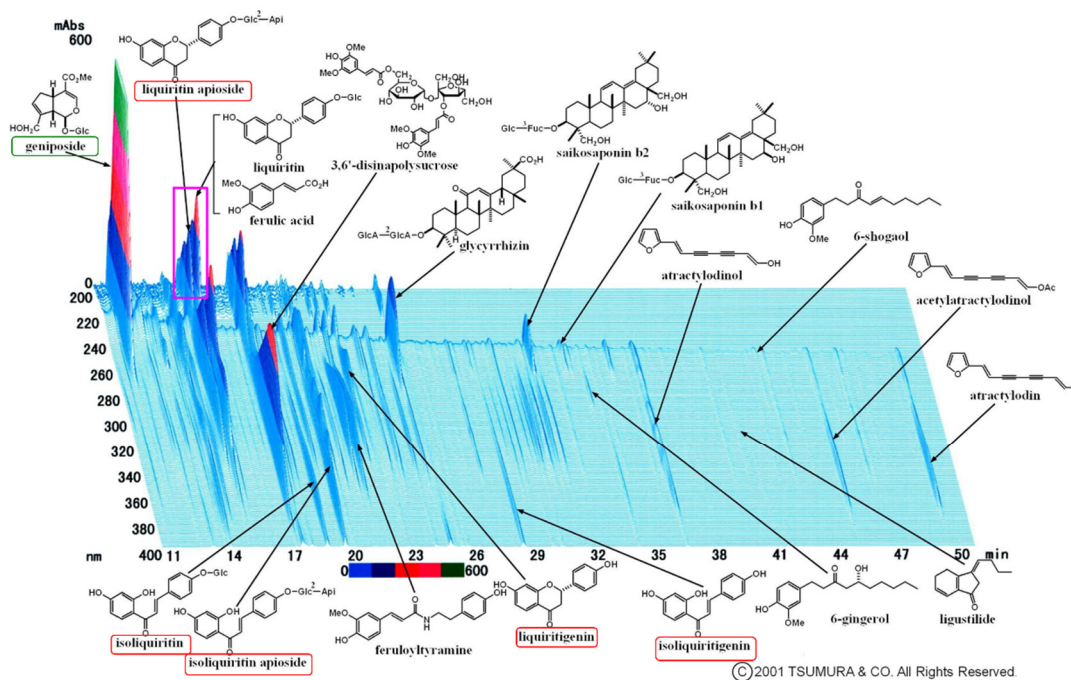

(c)

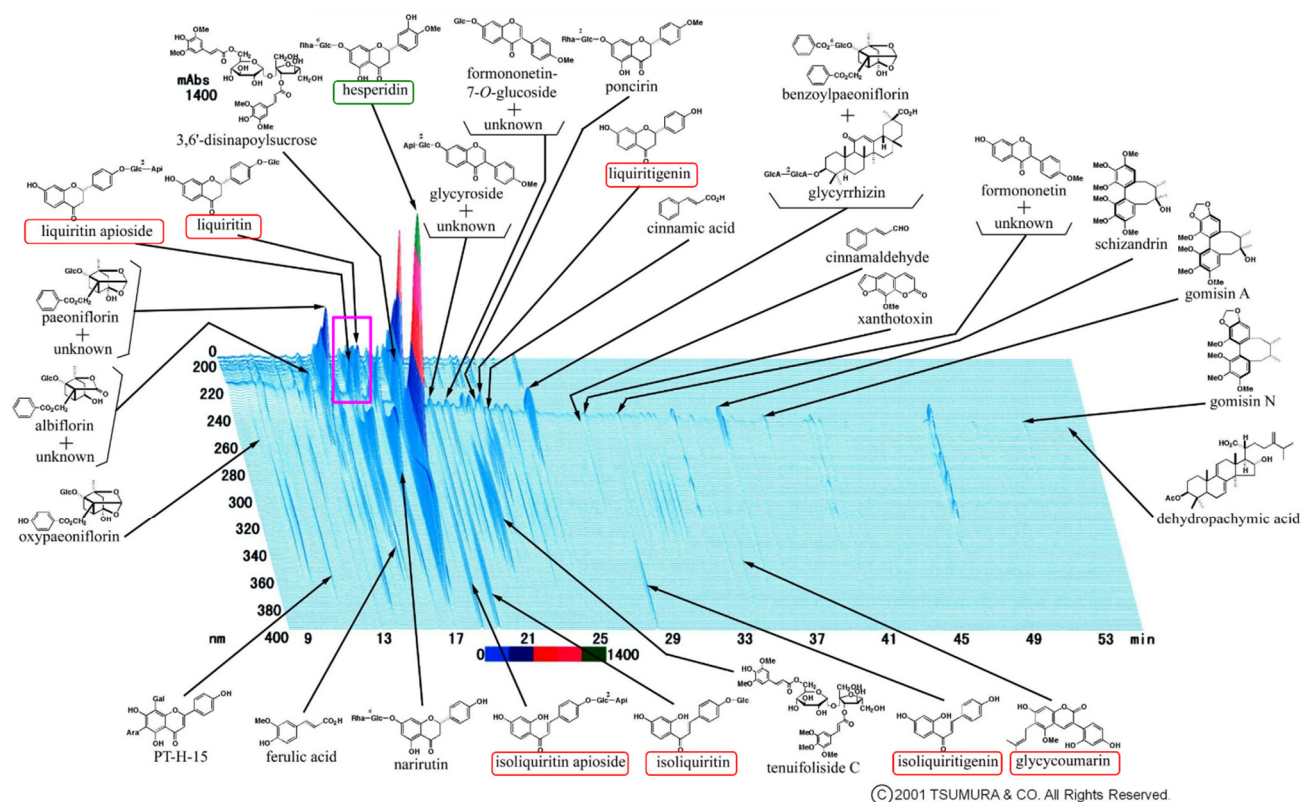

**Figure S4.** 3D-HPLC pattern of Kamishoyosan (a), Kamikihito (b), Ninjinyoeito (c). The green boxes is paeoniflorin,. The red boxes show the active estrogenic components, which are derived from the herb's or interherb's new metabolites, i.e. Liquiritin apioside, Liquiritin, Liquirtigenin, Formononetin+Paeonol, Isoliquiritin apioside, Glycyroside, Isoliquiritin, Formononet-in-7-O-glucoside, Isoliquiritigenin, Glycycoumarin. The pink box is the peak of Liquiritin apioside and Liquiritin.

(a) Alexa Fluor 488-conjugated anti-rabbit-IgG

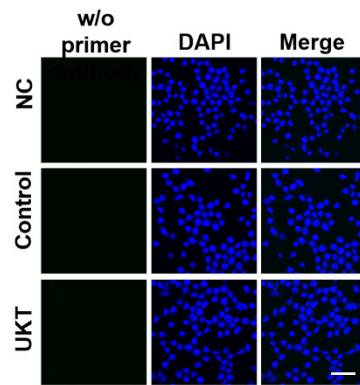

(b) Cy3 conjugated donkey anti-rabbit-IgG

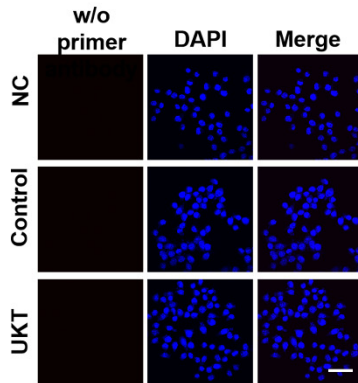

(c) Texas red conjugated anti-mouse-IgG

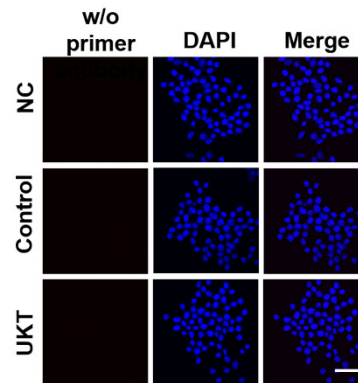

**Figure S5.** Secondary antibodies used for immunocytochemistry staining without primer antibodies were not detected. (a) Alexa Fluor 488-conjugated anti-rabbit-IgG (1:500); (b) Cy3 conjugated donkey anti-rabbit-IgG (1:200); (c) Texas red conjugated anti-mouse-IgG (1:200). Cells were stained with 4',6-diamidino-2-phenylindole (DAPI) for nuclear staining and observed using confocal laser scanning microscopy using an FV3000 system (Olympus). Images were analyzed using the cellSens Dimension software (Olympus) (scale bar = 10  $\mu$ m)

**Table S1.** Kampo medicine components

| Name                      |                             |                            |                              |
|---------------------------|-----------------------------|----------------------------|------------------------------|
| Unkeito<br>UKT (TJ-106)   | Kamishoyosan<br>KSS (TJ-24) | Kamikihito<br>KKT (TJ-137) | Ninjinyoeito<br>NYT (TJ-108) |
| Component                 |                             |                            |                              |
| Pinellia tuber            | Japanese angelica<br>root   | Ginseng                    | Ginseng                      |
| Ophiopogon tuber          | Peony root                  | Poria sclerotium           | Japanese angelica root       |
| Japanese angelica<br>root | Poria sclerotium            | Bupleurum root             | Poria sclerotium             |
| Peony root                | Bupleurum root              | Jujube seed                | Rehmannia root               |
| Moutan bark               | Moutan bark                 | Longan arillus             | Cinnamon bark                |
| Ginseng                   | Gardenia fruit              | Astragalus root            | Citrus unshiu peel           |
| Glycyrrhiza               | Glycyrrhiza                 | Japanese angelica<br>root  | Peony root                   |
| Cnidium rhizome           | Peppermint                  | Gardenia fruit             | Polygala root                |
| Cinnamon bark             | Ginger                      | Polygala root              | Schisandra fruit             |
| Evodia fruit              |                             | Jujube                     | Glycyrrhiza                  |
| Ginger                    |                             | Glycyrrhiza                | Astragalus root              |
|                           |                             | Saussurea root             |                              |
|                           |                             | Ginger                     |                              |

KEGG DRUG Database

**Table S2.** RT-qPCR primer pair sequences and gene probes for cell markers

| No. | Gene Name                     | Forward Primer (5'-3')                | Reverse Primer (5'-3')        |
|-----|-------------------------------|---------------------------------------|-------------------------------|
| 1   | Mouse <i>Gapdh</i>            | TGA CTC CAC TCA CGG CAA AT            | GGT CTC GCT CCT GGA AGA TG    |
| 2   | Mouse <i>Rela</i> (p65) V1    | CCC AGA CCG CAG TAT CCA T             | GCT CCA GGT CTC GCT TCT T     |
| 3   | Mouse <i>Nf-kb1</i> (p105/50) | TCT GGG GAT ACT GAA CAA TGC           | CCA GAG ACC TCA TAG TTG TCC A |
| 4   | Mouse <i>Bcl6</i> V2          | CCCACCCTAGGGAGTTGTG                   | CCCCCTCTCAAAAGATTCACT         |
| 5   | Mouse <i>Prdm1</i> (Blimp1)   | ACGTGTGGGTACGACCTTG                   | CCATGTCCATTTTCATGATCC         |
| 6   | Mouse <i>Nfatc1</i>           | TCC AAA GTC ATT TTC GTG GA            | CTT TGC TTC CAT CTC CCA GA    |
| 7   | Mouse <i>Mmp9</i>             | CCA GGA TAA ACT GTA TGG CT            | ACA GGA AGA GTA CTG CTT GC    |
| 8   | Mouse <i>Dc-stamp</i>         | ACA AAC AGT TCC AAA GCT TGC           | GAC TCC TTG GGT TCC TTG CT    |
| 9   | Mouse <i>Tnfr</i> (TRAP) V1   | GAG TCA GAC TAA TGT CAT CTG<br>TGG TT | ACC CCG AAA ATG GTG ATG       |
| 10  | Mouse <i>Ctsk</i>             | CCG AAT AAA TCT AGC ACC CTT<br>AGT    | GAA ACT TGA ACA CCC ACA TCC   |
| 11  | Mouse <i>Caspase3</i>         | GAG GCT GAC TTC CTG TAT GCT<br>T      | AAC CAC GAC CCG TCC TTT       |
| 12  | Mouse <i>Anxa5</i>            | TTG ACA TCC CGA AGC AAT G             | GAC TTC AGG TCA TCC ACA AGG   |
| 13  | Mouse Mapk14 (p38a) V1        | CCATCTGATGTCACCAATTCA                 | ATTTCAGAACCGGGGATAG           |
| 14  | Mouse Mapk1 (Erk2) V1         | GGATTGAAGTTGAACAGGCTCT                | GAATGGCGCTTCAGCAAT            |
| 15  | Mouse Mapk8 (Jnk) V1          | CATACTTCATGAGCTGCAAGGT                | CGCTCTTACTCCTGCTGATTG         |
| 16  | Mouse <i>Fos</i> (c-Fos)      | GGC TCT CCT GTC AAC ACA CA            | GAC CAG AGT GGG CTG CAC       |
| 17  | Mouse <i>Mafb</i>             | TCCCAGGAAGAGCAGAGGAG                  | TTCTTAGCTCAGCCTTGCC           |
